# Supplementary material for: Individual 5-Year Lung Cancer Risk Prediction Model in Korea Using a Nationwide Representative Database
Source: MDPI journal article supplement (doi:10.3390/cancers13143496), 2021-07-13
Supplement: s1 [file s1]

# Individual 5-Year Lung Cancer Risk Prediction Model in Korea Using a Nationwide Representative Database

Yohwan Yeo, Dong Wook Shin, Kyungdo Han, Sang Hyun Park, Keun-Hye Jeon, Jungkwon Lee, Junghyun Kim and Aesun Shin

**Table S1.** Scores for each risk factor category.

| No. | Variables                        | Categories and scores |         |       |       |      |
|-----|----------------------------------|-----------------------|---------|-------|-------|------|
| 1.  | Age (years)                      | 40–49                 | 50–59   | 60–69 | 70–79 | ≥ 80 |
|     |                                  | 0                     | 41      | 75    | 95    | 100  |
| 2.  | Sex                              | Female                | Male    |       |       |      |
|     |                                  | 0                     | 21      |       |       |      |
| 3.  | Smoking (pack-years)             | Non-smoker            | < 10    | 10–20 | 20–30 | ≥ 30 |
|     |                                  | 0                     | 4       | 13    | 24    | 41   |
| 4.  | BMI (kg/m <sup>2</sup> )         | < 18.5                | 18.5–23 | 23–25 | 25–30 | ≥ 30 |
|     |                                  | 24                    | 15      | 8     | 5     | 0    |
| 5.  | Type 2 DM                        | No                    | Yes     |       |       |      |
|     |                                  | 0                     | 3       |       |       |      |
| 6.  | COPD                             | No                    | Yes     |       |       |      |
|     |                                  | 0                     | 20      |       |       |      |
| 7.  | Previous history of pulmonary TB | No                    | Yes     |       |       |      |
|     |                                  | 0                     | 11      |       |       |      |

BMI, body mass index; DM, diabetes mellitus; COPD, chronic obstructive pulmonary disease; TB, tuberculosis.

**Table S2.** Predicted incidence rate (per 1,000 person-years) based on the development and validation cohorts.

| Decile                                                 |                    | 1st  | 2nd   | 3rd   | 4th   | 5th   | 6th   | 7th   | 8th    | 9th     | 10th |
|--------------------------------------------------------|--------------------|------|-------|-------|-------|-------|-------|-------|--------|---------|------|
| Points                                                 |                    | 0–15 | 16–30 | 31–45 | 46–53 | 54–62 | 63–81 | 82–92 | 93–107 | 108–123 | 124– |
| Incidence rate of lung cancer (per 1,000 person-years) | Development cohort | 0.20 | 0.23  | 0.22  | 0.45  | 0.45  | 0.58  | 0.83  | 1.19   | 1.85    | 5.39 |
|                                                        | Validation cohort  | 0.19 | 0.19  | 0.19  | 0.36  | 0.45  | 0.56  | 0.85  | 1.18   | 1.84    | 5.43 |

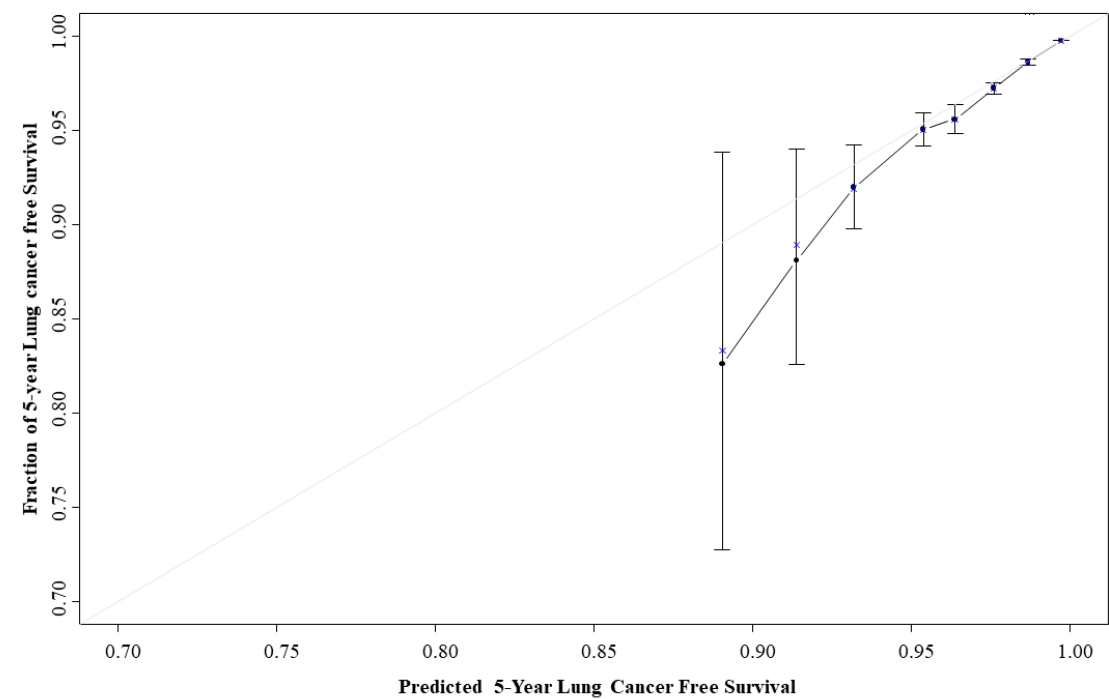

**Figure S1.** Calibration plots between predicted and observed 5-year lung cancer development.
